# Supplementary material for: Thrombin Cleavage of Plasmodium falciparum Erythrocyte Membrane Protein 1 Inhibits Cytoadherence
Source: PubMed Central journal article supplement (PMC5021802; doi:10.1128/mbio.01120-16), 2016-09-13
Supplement: mbo004162986st1.pdf [file mbo004162986st1.pdf]

**Table S1. Analysis of *P. falciparum* var genes for the presence of the putative thrombin cleavage site.** All published *P. falciparum* var genes from seven published parasite genotypes (33) were analyzed for the presence of the putative thrombin cleavage site PPRRRRLY. For each var gene, the var group (UPS), presence of the DBL $\delta$ 1 domain, and predicted binding phenotype were ascertained.

| PPRRRRLY   | DBL $\delta$ 1 | UPS | Binding Phenotype | Domain Content                                                                                                       |
|------------|----------------|-----|-------------------|----------------------------------------------------------------------------------------------------------------------|
| <b>DD2</b> |                |     |                   |                                                                                                                      |
| var01a     | 1              | B   | CD36              | DBL $\alpha$ 0.6 CIDR $\alpha$ 3.1 DBL $\beta$ 5 DBL $\gamma$ 5 DBL $\delta$ 1 CIDR $\beta$ 1                        |
| var01b     | 1              | B   | CD36              | DBL $\alpha$ 0.6 CIDR $\alpha$ 3.1 DBL $\beta$ 5 DBL $\gamma$ 5 DBL $\delta$ 1 CIDR $\beta$ 1                        |
| var07      | 1              | C   | CD36              | DBL $\alpha$ 0.16 CIDR $\alpha$ 2.3 DBL $\delta$ 1 CIDR $\beta$ 5                                                    |
| var09b     | 1              | A   | OTHER             | DBL $\alpha$ 1.5 CIDR $\delta$ 2 DBL $\gamma$ 11 DBL $\beta$ 7 DBL $\delta$ 1 CIDR $\beta$ 1                         |
| var10      | 1              | C   | CD36              | DBL $\alpha$ 0.15 CIDR $\alpha$ 3.2 DBL $\delta$ 1 CIDR $\beta$ 1                                                    |
| var11      | 1              | B   | CD36              | DBL $\alpha$ 0.15 CIDR $\alpha$ 3.2 DBL $\delta$ 1 CIDR $\beta$ 1                                                    |
| var12      | 1              | C   | CD36              | DBL $\alpha$ 0.24 CIDR $\alpha$ 3.3 DBL $\delta$ 1 CIDR $\gamma$ 6                                                   |
| var13      | 1              | B   | CD36              | DBL $\alpha$ 0.8 CIDR $\alpha$ 3.5 DBL $\beta$ 8 DBL $\delta$ 1 CIDR $\beta$ 1                                       |
| var19      | 1              | B   | CD36              | DBL $\alpha$ 0.10 CIDR $\alpha$ 2.2 DBL $\delta$ 1 CIDR $\gamma$ 9 DBL $\zeta$ 6 DBL $\epsilon$ 6                    |
| var20      | 1              | B   | CD36              | DBL $\alpha$ 0.9 CIDR $\alpha$ 2.7 DBL $\delta$ 1 CIDR $\beta$ 6                                                     |
| var24      | 1              | B   | CD36              | DBL $\alpha$ 0.15 CIDR $\alpha$ 3.2 DBL $\beta$ 5 DBL $\delta$ 1 CIDR $\gamma$ 1 DBL $\gamma$ 3 DBL $\zeta$ 4        |
| var26      | 1              | C   | CD36              | DBL $\alpha$ 0.19 CIDR $\alpha$ 2.3 DBL $\delta$ 1 CIDR $\beta$ 5                                                    |
| var29      | 1              | B   | CD36              | DBL $\alpha$ 0.16 CIDR $\alpha$ 3.4 DBL $\delta$ 1 CIDR $\beta$ 1 DBL $\gamma$ 10                                    |
| var31      | 1              | B   | CD36              | DBL $\alpha$ 0.5 CIDR $\alpha$ 2.6 DBL $\delta$ 1 CIDR $\beta$ 1                                                     |
| var32      | 1              | A   | EPCR              | DBL $\alpha$ 1.7 CIDR $\alpha$ 1.4 DBL $\beta$ 1 DBL $\beta$ 6 DBL $\gamma$ 11 DBL $\delta$ 1 CIDR $\gamma$ 5        |
| var33      | 1              | B   | CD36              | DBL $\alpha$ 0.9 CIDR $\alpha$ 2.1 DBL $\delta$ 1 CIDR $\beta$ 3                                                     |
| var35      | 1              | B   | CD36              | DBL $\alpha$ 0.2 CIDR $\alpha$ 3.1 DBL $\delta$ 1 CIDR $\gamma$ 7                                                    |
| var37      | 1              | B   | CD36              | DBL $\alpha$ 0.3 CIDR $\alpha$ 3.2 DBL $\delta$ 1 CIDR $\gamma$ 5                                                    |
| var39      | 1              | B   | CD36              | DBL $\alpha$ 0.10 CIDR $\alpha$ 2.8 DBL $\delta$ 1 CIDR $\beta$ 1                                                    |
| var41      | 1              | C   | CD36              | DBL $\alpha$ 0.16 CIDR $\alpha$ 3.4 DBL $\beta$ 10 DBL $\delta$ 1 CIDR $\beta$ 1                                     |
| var42      | 1              | A   | EPCR              | DBL $\alpha$ 1.2 CIDR $\alpha$ 1.7 DBL $\beta$ 7 DBL $\gamma$ 2 DBL $\delta$ 1 CIDR $\beta$ 1                        |
| var44      | 1              | B   | CD36              | DBL $\alpha$ 0.23 CIDR $\alpha$ 3.1 DBL $\delta$ 1 CIDR $\beta$ 5                                                    |
| var45      | 1              | C   | CD36              | DBL $\alpha$ 0.1 CIDR $\alpha$ 3.1 DBL $\delta$ 1 CIDR $\gamma$ 4                                                    |
| var51      | 0              | C   | CD36              | DBL $\alpha$ 0.1 CIDR $\alpha$ 3.2 DBL $\delta$ 6 CIDR $\beta$ 2                                                     |
| <b>HB3</b> |                |     |                   |                                                                                                                      |
| var01      | 1              | A   | OTHER             | DBL $\alpha$ 1.6 CIDR $\delta$ 2 DBL $\beta$ 7 DBL $\gamma$ 13 DBL $\gamma$ 9 DBL $\delta$ 1 CIDR $\beta$            |
| var08      | 1              | B   | CD36              | DBL $\alpha$ 0.9 CIDR $\alpha$ 2.7 DBL $\delta$ 1 CIDR $\gamma$ 7 DBL $\gamma$ 14 DBL $\zeta$ 5 DBL $\epsilon$ 4     |
| var10      | 1              | B   | CD36              | DBL $\alpha$ 0.6 CIDR $\alpha$ 3.1 DBL $\beta$ 5 DBL $\delta$ 1 CIDR $\beta$ 6                                       |
| var11      | 1              | B   | CD36              | DBL $\alpha$ 0.12 CIDR $\alpha$ 2.1 DBL $\delta$ 1 CIDR $\beta$ 3 DBL $\epsilon$ 4                                   |
| var16      | 1              | B   | CD36              | DBL $\alpha$ 0.9 CIDR $\alpha$ 2.2 DBL $\delta$ 1 CIDR $\beta$ 1                                                     |
| var19      | 1              | B   | CD36              | DBL $\alpha$ 0.12 CIDR $\alpha$ 2.2 DBL $\delta$ 1 CIDR $\gamma$ 5                                                   |
| var22      | 0              | B   | CD36              | DBL $\alpha$ 0.8 CIDR $\alpha$ 2.2 DBL $\delta$ 3 CIDR $\gamma$ 2 DBL $\epsilon$ 2 DBL $\epsilon$ 7 DBL $\epsilon$ 3 |
| var26      | 1              | C   | CD36              | DBL $\alpha$ 0.8 CIDR $\alpha$ 3.5 DBL $\delta$ 1 CIDR $\beta$ 1                                                     |
| var27      | 1              | B   | CD36              | DBL $\alpha$ 0.1 CIDR $\alpha$ 3.1 DBL $\delta$ 1 CIDR $\beta$ 1                                                     |
| var29      | 1              | C   | CD36              | DBL $\alpha$ 0.2 CIDR $\alpha$ 3.2 DBL $\delta$ 1 CIDR $\beta$ 1                                                     |
| var30      | 1              | B   | CD36              | DBL $\alpha$ 0.1 CIDR $\alpha$ 3.2 DBL $\delta$ 1 CIDR $\beta$ 1                                                     |
| var32      | 1              | C   | CD36              | DBL $\alpha$ 0.15 CIDR $\alpha$ 3.1 DBL $\delta$ 1 CIDR $\gamma$ 1                                                   |

|                 |   |    |      |                                                  |
|-----------------|---|----|------|--------------------------------------------------|
| var33           | 1 | C  | CD36 | DBLα0.22 CIDRα3.1 DBLδ1 CIDRγ6                   |
| var36           | 1 | C  | CD36 | DBLα0.4 CIDRα3.2 DBLδ1 CIDRβ6                    |
| var40           | 1 | B  | CD36 | DBLα0.7 CIDRα3.4 DBLδ1 CIDRγ1 DBLζ6 DBLε9        |
| var50           | 1 | B  | CD36 | DBLα0.1 CIDRα3.2 DBLδ1 CIDRβ6 DBLζ6 DBLε9        |
| <b>IGH</b>      |   |    |      |                                                  |
| var01           | 1 | B  | CD36 | DBLα0.15 CIDRα3.2 DBLδ1 CIDRβ1                   |
| var03           | 1 | B  | CD36 | DBLα0.5 CIDRα2.6 DBLδ1 CIDRβ1                    |
| var05           | 1 | B  | CD36 | DBLα0.3 CIDRα3.4 DBLγ10 DBLδ1 CIDRγ5             |
| var06           | 1 | C  | CD36 | DBLα0.24 CIDRα3.1 DBLδ1 CIDRβ6                   |
| var08           | 1 | B  | CD36 | DBLα0.14 CIDRα4 DBLδ1 CIDRβ6                     |
| var09           | 1 | A  | EPCR | DBLα1.2 CIDRα1.5 DBLβ6 DBLγ2 DBLγ4 DBLδ1 CIDRβ5  |
| var16           | 1 | C  | CD36 | DBLα0.11 CIDRα2.4 DBLδ1 CIDRβ6                   |
| var19           | 1 | B  | EPCR | DBLα2 CIDRα1.1 DBLβ1 DBLγ6 DBLδ1 CIDRβ1          |
| var20           | 1 | B  | CD36 | DBLα0.4 CIDRα3.1 DBLδ1 CIDRγ11                   |
| var23           | 1 | A  | EPCR | DBLα1.7 CIDRα1.4 DBLβ1 DBLγ11 DBLγ2 DBLδ1 CIDRβ1 |
| var25           | 1 | B  | CD36 | DBLα0.9 CIDRα2.2 DBLδ1 CIDRγ7                    |
| var27           | 1 | A  | EPCR | DBLα1.7 CIDRα1.4 DBLβ3 DBLβ6 DBLδ1 CIDRβ1        |
| var36           | 1 | C  | CD36 | DBLα0.22 CIDRα3.1 DBLδ1 CIDRγ7                   |
| var37           | 1 | C  | CD36 | DBLα0.8 CIDRα5 DBLβ5 DBLγ5 DBLδ1 CIDRγ11         |
| <b>IT4/FCR3</b> |   |    |      |                                                  |
| var05           | 1 | C  | CD36 | DBLα0.5 CIDRα2.3 DBLδ1 CIDRβ1                    |
| var06           | 1 | B  | EPCR | DBLα2 CIDRα1.1 DBLβ12 DBLγ6 DBLδ1 CIDRβ4         |
| var07           | 1 | A  | EPCR | DBLα1.7 CIDRα1.4 DBLβ1 DBLβ3 DBLγ10 DBLδ1 CIDRβ1 |
| var12           | 1 | ND | CD36 | DBLα0.18 CIDRα6 DBLβ4 DBLδ1 CIDRβ1               |
| var15           | 1 | B  | CD36 | DBLα0.8 CIDRα3.5 DBLβ8 DBLδ1 CIDRβ1              |
| var19           | 1 | B  | EPCR | DBLα2 CIDRα1.1 DBLβ12 DBLγ6 DBLδ1 CIDRβ1 DBLγ9   |
| var21           | 1 | ND | CD36 | DBLα0.1 CIDRα3.1 DBLδ1 CIDRβ1                    |
| var24           | 1 | B  | CD36 | DBLα0.10 CIDRα2.2 DBLδ1 CIDRγ5                   |
| var25           | 1 | B  | CD36 | DBLα0.11 CIDRα2.4 DBLδ1 CIDRβ1                   |
| var26           | 1 | B  | CD36 | DBLα0.23 CIDRα3.3 DBLδ1 CIDRβ1                   |
| var27           | 1 | B  | CD36 | DBLα0.6 CIDRα3.1 DBLβ5 DBLγ5 DBLδ1 CIDRβ1        |
| var29           | 1 | B  | CD36 | DBLα0.3 CIDRα3.2 DBLδ1 CIDRγ5                    |
| var30           | 1 | ND | CD36 | DBLα0.13 CIDRα2.10 DBLδ1 CIDRβ1                  |
| var32a          | 1 | ND | CD36 | DBLα0.23 CIDRα3.2 DBLγ6 DBLδ1 CIDRβ1             |
| var32b          | 1 | B  | EPCR | DBLα2 CIDRα1.1 DBLβ12 DBLγ6 DBLδ1 CIDRβ1         |
| var33           | 1 | B  | CD36 | DBLα0.11 CIDRα2.4 DBLδ1 CIDRβ5                   |
| var34           | 1 | C  | CD36 | DBLα0.1 CIDRα3.1 DBLδ1 CIDRβ4                    |
| var39           | 1 | ND | CD36 | DBLα0.5 CIDRα2.5 DBLδ1 CIDRβ6                    |
| var40*          | 0 | B  | CD36 | DBLα0.12 CIDRα2.11                               |
| var41           | 1 | B  | CD36 | DBLα0.4 CIDRα5 DBLβ5 DBLγ5 DBLδ1 CIDRβ1          |
| var44           | 1 | B  | CD36 | DBLα0.16 CIDRα3.4 DBLβ13 DBLδ1 CIDRβ6            |
| var45           | 1 | B  | CD36 | DBLα0.5 CIDRα2.9 DBLδ1 CIDRβ1                    |
| var46           | 1 | B  | CD36 | DBLα0.10 CIDRα2.2 DBLδ1 CIDRγ4 DBLε2 DBLζ3 DBLε3 |
| var47           | 1 | C  | CD36 | DBLα0.1 CIDRα3.3 DBLδ1 CIDRβ1                    |
| var51           | 1 | C  | CD36 | DBLα0.17 CIDRα3.1 DBLδ1 CIDRγ12                  |
| var59           | 1 | B  | CD36 | DBLα0.1 CIDRα3.1 DBLδ1 CIDRβ1                    |
| var62           | 1 | B  | CD36 | DBLα0.1 CIDRα3.1 DBLδ8 CIDRβ2                    |

**3D7**

|            |   |   |       |                                                                                                                 |
|------------|---|---|-------|-----------------------------------------------------------------------------------------------------------------|
| MAL6P1.1   | 1 | B | CD36  | DBL $\alpha$ 0.8 CIDR $\alpha$ 4 DBL $\delta$ 1 CIDR $\beta$ 1                                                  |
| MAL6P1.252 | 1 | C | CD36  | DBL $\alpha$ 0.21 CIDR $\alpha$ 2.1 DBL $\beta$ 4 DBL $\delta$ 1 CIDR $\beta$ 1                                 |
| MAL7P1.212 | 1 | B | CD36  | DBL $\alpha$ 0.17 CIDR $\alpha$ 3.1 DBL $\delta$ 1 CIDR $\beta$ 1                                               |
| MAL7P1.55  | 1 | B | CD36  | DBL $\alpha$ 0.9 CIDR $\alpha$ 2.4 DBL $\delta$ 1 CIDR $\gamma$ 5                                               |
| MAL7P1.56  | 1 | C | CD36  | DBL $\alpha$ 0.20 CIDR $\alpha$ 3.1 DBL $\delta$ 1 CIDR $\beta$ 1                                               |
| PF07_0048  | 1 | C | CD36  | DBL $\alpha$ 0.1 CIDR $\alpha$ 3.2 DBL $\delta$ 1 CIDR $\beta$ 6                                                |
| PF07_49    | 1 | C | CD36  | DBL $\alpha$ 0.17 CIDR $\alpha$ 3.1 DBL $\delta$ 1 CIDR $\gamma$ 7                                              |
| PF07_51    | 1 | C | CD36  | DBL $\alpha$ 0.1 CIDR $\alpha$ 3.1 DBL $\delta$ 1 CIDR $\beta$ 1                                                |
| PF08_0103  | 1 | B | CD36  | DBL $\alpha$ 0.12 CIDR $\alpha$ 2.2 DBL $\delta$ 1 CIDR $\beta$ 1                                               |
| PF08_0142  | 1 | B | CD36  | DBL $\alpha$ 0.9 CIDR $\alpha$ 2.11 DBL $\delta$ 1 CIDR $\beta$ 1                                               |
| PF10_0406  | 1 | B | CD36  | DBL $\alpha$ 0.9 CIDR $\alpha$ 2.7 DBL $\delta$ 1 CIDR $\beta$ 1                                                |
| PF11_0007  | 1 | B | CD36  | DBL $\alpha$ 0.15 CIDR $\alpha$ 3.2 DBL $\delta$ 1 CIDR $\beta$ 1                                               |
| PF11_0521  | 0 | A | EPCR  | DBL $\alpha$ 1.7 CIDR $\alpha$ 1.4 DBL $\beta$ 3 DBL $\beta$ 6 DBL $\delta$ 3 CIDR $\gamma$ 2                   |
| PF13_0001  | 1 | B | CD36  | DBL $\alpha$ 0.11 CIDR $\alpha$ 2.4 DBL $\delta$ 1 CIDR $\beta$ 1                                               |
| PF13_0003  | 0 | A | OTHER | DBL $\alpha$ 1.6 CIDR $\delta$ 1 DBL $\beta$ 3 DBL $\gamma$ 12 DBL $\delta$ 5 CIDR $\beta$ 3 DBL $\beta$ 9      |
| PFA0005w   | 1 | B | CD36  | DBL $\alpha$ 0.11 CIDR $\alpha$ 2.8 DBL $\delta$ 1 CIDR $\beta$ 1                                               |
| PFB1055c   | 1 | B | CD36  | DBL $\alpha$ 0.16 CIDR $\alpha$ 3.4 DBL $\delta$ 1 CIDR $\beta$ 1                                               |
| PFC0005w   | 1 | B | CD36  | DBL $\alpha$ 0.9 CIDR $\alpha$ 2.4 DBL $\delta$ 1 CIDR $\beta$ 1                                                |
| PFD0020c   | 1 | A | EPCR  | DBL $\alpha$ 1.2 CIDR $\alpha$ 1.1 DBL $\beta$ 12 DBL $\gamma$ 6 DBL $\gamma$ 11 DBL $\delta$ 1 CIDR $\gamma$ 8 |
| PFD615c    | 1 | C | CD36  | DBL $\alpha$ 0.17 CIDR $\alpha$ 3.1 DBL $\delta$ 1 CIDR $\beta$ 1                                               |
| PFD630c    | 1 | C | CD36  | DBL $\alpha$ 0.1 CIDR $\alpha$ 3.1 DBL $\delta$ 1 CIDR $\gamma$ 2                                               |
| PFD635c    | 1 | B | CD36  | DBL $\alpha$ 0.1 CIDR $\alpha$ 3.1 DBL $\delta$ 1 CIDR $\gamma$ 2                                               |
| PFD995c    | 1 | C | CD36  | DBL $\alpha$ 0.1 CIDR $\alpha$ 3.2 DBL $\delta$ 1 CIDR $\gamma$ 6                                               |
| PFD1000c   | 1 | C | CD36  | DBL $\alpha$ 0.1 CIDR $\alpha$ 3.2 DBL $\delta$ 1 CIDR $\gamma$ 11                                              |
| PFD1005c   | 1 | B | CD36  | DBL $\alpha$ 0.8 CIDR $\alpha$ 4 DBL $\delta$ 1 CIDR $\gamma$ 11                                                |
| PFD1235w   | 1 | A | EPCR  | DBL $\alpha$ 1.4 CIDR $\alpha$ 1.6 DBL $\beta$ 3 DBL $\beta$ 3 DBL $\gamma$ 13 DBL $\delta$ 1 CIDR $\beta$ 5    |
| PFE0005w   | 1 | B | CD36  | DBL $\alpha$ 0.11 CIDR $\alpha$ 2.4 DBL $\delta$ 1 CIDR $\beta$ 1                                               |
| PFL0935c   | 1 | B | CD36  | DBL $\alpha$ 0.16 CIDR $\alpha$ 3.4 DBL $\delta$ 1 CIDR $\gamma$ 12                                             |
| PFL1955w   | 1 | B | CD36  | DBL $\alpha$ 0.16 CIDR $\alpha$ 3.4 DBL $\delta$ 1 CIDR $\gamma$ 12                                             |
| PFL1960w   | 1 | C | CD36  | DBL $\alpha$ 0.20 CIDR $\alpha$ 3.1 DBL $\delta$ 1 CIDR $\beta$ 1                                               |
| PFL2665c   | 1 | B | CD36  | DBL $\alpha$ 0.19 CIDR $\alpha$ 2.3 DBL $\delta$ 1 CIDR $\beta$ 1                                               |

**PFCLIN**

|        |   |    |       |                                                                                                |
|--------|---|----|-------|------------------------------------------------------------------------------------------------|
| var26  | 1 | C  | CD36  | DBL $\alpha$ 0.16 CIDR $\alpha$ 3.4 DBL $\delta$ 1 CIDR $\gamma$ 5                             |
| var32  | 1 | A  | EPCR  | DBL $\alpha$ 1.2 CIDR $\alpha$ 1.4 DBL $\beta$ 7 DBL $\gamma$ 11 DBL $\delta$ 1 CIDR $\beta$ 1 |
| var41  | 1 | C  | CD36  | DBL $\alpha$ 0.17 CIDR $\alpha$ 3.1 DBL $\delta$ 1 CIDR $\beta$ 1                              |
| var44  | 1 | B  | CD36  | DBL $\alpha$ 0.5 CIDR $\alpha$ 2.5 DBL $\beta$ 13 DBL $\delta$ 1 CIDR $\gamma$ 4               |
| var47  | 1 | C  | CD36  | DBL $\alpha$ 0.17 CIDR $\alpha$ 3.1 DBL $\delta$ 1 CIDR $\beta$ 1                              |
| var54  | 1 | B  | CD36  | DBL $\alpha$ 0.15 CIDR $\alpha$ 3.2 DBL $\delta$ 1 CIDR $\beta$ 1                              |
| var55  | 1 | C  | CD36  | DBL $\alpha$ 0.5 CIDR $\alpha$ 2.6 DBL $\delta$ 1 CIDR $\beta$ 1                               |
| var56  | 1 | C  | CD36  | DBL $\alpha$ 0.1 CIDR $\alpha$ 3.1 DBL $\delta$ 1 CIDR $\beta$ 6                               |
| var59# | 1 | ND | OTHER | DBL $\beta$ 5 DBL $\beta$ 8 DBL $\delta$ 1 CIDR $\beta$ 2                                      |
| var63  | 1 | C  | CD36  | DBL $\alpha$ 0.4 CIDR $\alpha$ 3.1 DBL $\delta$ 1 CIDR $\beta$ 1                               |
| var64  | 1 | C  | CD36  | DBL $\alpha$ 0.19 CIDR $\alpha$ 3.4 DBL $\delta$ 1 CIDR $\gamma$ 6                             |
| var65  | 1 | B  | CD36  | DBL $\alpha$ 0.1 CIDR $\alpha$ 3.1 DBL $\delta$ 1 CIDR $\beta$ 1                               |
| var66  | 1 | C  | CD36  | DBL $\alpha$ 0.5 CIDR $\alpha$ 2.10 DBL $\beta$ 13 DBL $\delta$ 1 CIDR $\gamma$ 11             |
| var77* | 1 | ND | ?     | DBL $\delta$ 1 CIDR $\beta$ 1                                                                  |

**RAJ116**

|       |   |   |       |                                           |
|-------|---|---|-------|-------------------------------------------|
| var10 | 1 | B | CD36  | DBLα0.9 CIDRα2.1 DBLδ1 CIDRγ10            |
| var11 | 1 | B | EPCR  | DBLα2 CIDRα1.8 DBLβ12 DBLγ4 DBLδ1 CIDRβ1  |
| var13 | 1 | B | CD36  | DBLα0.1 CIDRα3.3 DBLδ1 CIDRβ6             |
| var19 | 1 | A | OTHER | DBLα1.6 CIDRδ1 DBLγ2 DBLδ1 CIDRβ1         |
| var30 | 1 | B | CD36  | DBLα0.13 CIDRα2.6 DBLδ1 CIDRβ4 DBLε2      |
| var31 | 1 | B | CD36  | DBLα0.5 CIDRα2.6 DBLδ1 CIDRβ5             |
| var33 | 1 | B | CD36  | DBLα0.18 CIDRα6 DBLβ4 DBLγ13 DBLδ1 CIDRβ1 |
| var34 | 1 | B | CD36  | DBLα0.15 CIDRα3.2 DBLδ1 CIDRγ10           |
| var36 | 1 | B | CD36  | DBLα0.13 CIDRα2.9 DBLδ1 CIDRβ3            |

**Plasmodium reichenowi**

|       |   |    |      |                                |
|-------|---|----|------|--------------------------------|
| var49 | 1 | ND | CD36 | CIDRα4 DBLδ1 CIDRβ5            |
| var77 | 1 | ND | ?    | DBLδ1 CIDRβ5                   |
| var85 | 1 | ND | CD36 | DBLα0.8 CIDRα5 DBLβ8 DBLδ1     |
| var93 | 1 | B  | CD36 | DBLα0.16 CIDRα3.4 DBLδ1 CIDRβ1 |

|         | PPRRRLY | DBLδ1 | UPS   | Count | %               | <b>P.falcip varA,B,C only</b> |
|---------|---------|-------|-------|-------|-----------------|-------------------------------|
| Total   | 139     | 134   | A     | 14    | 10.37037        | <b>10.9375</b>                |
| Pfalcip | 135     | 130   | B     | 76    | 56.2963         | <b>59.375</b>                 |
| Preich  | 4       | 4     | C     | 38    | 28.14815        | <b>29.6875</b>                |
|         |         |       | ND    | 7     | 5.185185        |                               |
|         |         |       | Total | 135   |                 |                               |
|         |         |       | CD36  | 114   | <b>85.07463</b> |                               |
|         |         |       | EPCR  | 15    | <b>11.19403</b> |                               |
|         |         |       | OTHER | 5     | <b>3.731343</b> |                               |
|         |         |       | Total | 134   |                 |                               |

\* var genes that are only partially sequenced

# PFCLINvar59 is predicted to be a DC8 EPCR binder but the distal n-terminal did not sequence well
